# Supplementary material for: Usability, acceptability and feasibility of a novel technology with visual guidance with video and audio recording during newborn resuscitation: a pilot study
Source: HighWire-hosted journal article supplement (doi:10.1136/bmjhci-2022-100667), 2022-12-01
Supplement: bmjhci-2022-100667supp001_data_supplement.pdf [file bmjhci-2022-100667supp001_data_supplement.pdf]

**Supplementary file 1.** The System Usability Scale statements, our modifications, and translation.

| Item | SUS statement                                                                              | Modified statement                                                                       | Statement in Nepali                                                           |
|------|--------------------------------------------------------------------------------------------|------------------------------------------------------------------------------------------|-------------------------------------------------------------------------------|
| 1    | I think that I would like to use this system frequently.                                   | I want to use the technology frequently.                                                 | मेरो बिचारमा म [TECHNOLOGY] को धेरै प्रयोग गर्न चाहन्छु ।                     |
| 2    | I found the system unnecessarily complex.                                                  | I found the technology system unnecessarily complex.                                     | मैले [TECHNOLOGY] अनावश्यक रूपमा अघ्यारो पाएँ ।                               |
| 3    | I thought the system was easy to use.                                                      | I think the technology is easy to use.                                                   | मेरो लागी [TECHNOLOGY] प्रयोग गर्न सजिलो थियो।                                |
| 4    | I think that I would need the support of a technical person to be able to use this system. | I think a person needs to be good in technology for the use of the system.               | मलाई [TECHNOLOGY] प्रयोग गर्न प्राविधिक व्यक्तिको सहयोग चाहिन्छ भन्ने लाग्छ । |
| 5    | I found the various functions in this system were well integrated.                         | I found the components of the technology well-integrated.                                | मैले [TECHNOLOGY] मा विभिन्न विषयहरू राम्ररी एकिकृत भएको पाएँ ।               |
| 6    | I thought there was too much inconsistency in this system.                                 | There is a lot of inconsistency or mismatch among the components of technology.          | मेरो बिचारमा [TECHNOLOGY] मा धेरै विसंगति छन् ।                               |
| 7    | I would imagine that most people would learn to use this system very quickly.              | I think that other people like me can learn the use/operation of the technology quickly. | मेरो बिचारमा अधिकांश मानिसहरूले [TECHNOLOGY] चाँडै प्रयोग गर्न सकिन्छन् ।     |
| 8    | I found the system very cumbersome to use.                                                 | I think the technology is very inconvenient to use.                                      | मेरो [TECHNOLOGY] को प्रयोग गर्न धेरै गाह्रो पाएँ ।                           |
| 9    | I felt very confident using the system.                                                    | I felt very confident using the technology.                                              | मैले [TECHNOLOGY] प्रयोग गर्न धेरै बिस्वस्त महसुस गरे ।                       |
| 10   | I needed to learn a lot of things before I could get going with this system                | I might need to learn a lot of things before I could get going with the technology.      | मैले [TECHNOLOGY] प्रयोग गर्नु अघि धेरै कुराहरू सिक्नु पर्‍यो ।               |
