# Supplementary material for: Usability, acceptability and feasibility of a novel technology with visual guidance with video and audio recording during newborn resuscitation: a pilot study
Source: HighWire-hosted journal article supplement (doi:10.1136/bmjhci-2022-100667), 2022-12-01
Supplement: bmjhci-2022-100667supp002_data_supplement.pdf [file bmjhci-2022-100667supp002_data_supplement.pdf]

## Supplementary file 2. Healthcare Provider Usability Scores Subgroup Analysis

| System Usability Scale (SUS)                                                                | Score mean <sup>a</sup> (SD) |                                                     |                                               |                                 |                            |                              |                               |                              |                               |                 |                |
|---------------------------------------------------------------------------------------------|------------------------------|-----------------------------------------------------|-----------------------------------------------|---------------------------------|----------------------------|------------------------------|-------------------------------|------------------------------|-------------------------------|-----------------|----------------|
|                                                                                             | Total<br>(N=25)              | Newborn resuscitation and/or NeoNatalie skill drill |                                               |                                 |                            | Years of experience          |                               | Education                    |                               | Position/role   |                |
|                                                                                             |                              | Both<br>(n=10)                                      | Only<br>newborn<br>resuscitatio<br>n<br>(n=6) | Only<br>NeoNatali<br>e<br>(n=5) | Neither<br>(n=4)           | <7 years<br>(n=17)           | ≥7 years<br>(n=8)             | Diploma<br>(n=17)            | Bachelor<br>(n=8)             | Nurse<br>(n=16) | Other<br>(n=9) |
| 1. I want to use the technology frequently.                                                 | 4.52<br>(0.87)               | 4.40<br>(1.26)                                      | 4.67<br>(0.52)                                | 4.60<br>(0.55)                  | 4.50<br>(0.58)             | 4.76<br>(0.44)               | 4.00<br>(1.31)                | 4.71<br>(0.47)               | 4.13<br>(1.36)                | 4.50<br>(1.03)  | 4.56<br>(0.53) |
| 2. I found the technology unnecessarily complex.                                            | 2.04<br>(1.37)               | 1.90<br>(1.45)                                      | 1.83<br>(1.17)                                | 2.00<br>(1.00)                  | 2.75<br>(2.06)             | 2.06<br>(1.34)               | 2.00<br>(1.51)                | 2.00<br>(1.32)               | 2.13<br>(1.55)                | 1.81<br>(1.28)  | 2.44<br>(1.51) |
| 3. I think the technology is easy to use.                                                   | 4.48<br>(0.87)               | 4.50<br>(0.97)                                      | 4.17<br>(1.17)                                | 4.40<br>(0.55)                  | 5.00<br>(0)                | 4.53<br>(0.80)               | 4.38<br>(1.06)                | 4.47<br>(0.80)               | 4.50<br>(1.07)                | 4.38<br>(1.02)  | 4.67<br>(0.50) |
| 4. I think a person needs to be good in technology for the use of the technology.           | 4.28<br>(1.28)               | 4.70<br>(0.67)                                      | 4.83<br>(0.41)                                | 3.20<br>(2.05)                  | 3.75<br>(1.50)             | <b>4.82</b><br><b>(0.53)</b> | <b>3.13*</b><br><b>(1.64)</b> | <b>4.00</b><br><b>(1.46)</b> | <b>4.88*</b><br><b>(0.35)</b> | 4.25<br>(1.39)  | 4.33<br>(1.12) |
| 5. I found the components of the technology well-integrated.                                | 4.88<br>(0.33)               | <b>5.00</b><br><b>(0)</b>                           | <b>5.00</b><br><b>(0)</b>                     | <b>4.40</b><br><b>(0.55)</b>    | <b>5.00*</b><br><b>(0)</b> | 4.94<br>(0.24)               | 4.75<br>(0.46)                | 4.82<br>(0.39)               | 5.00<br>(0)                   | 4.81<br>(0.40)  | 5.00<br>(0)    |
| 6. There is a lot of inconsistency or mismatch among the components of technology.          | 2.44<br>(1.45)               | 2.60<br>(1.51)                                      | 1.50<br>(1.22)                                | 3.00<br>(1.41)                  | 2.75<br>(1.50)             | 2.47<br>(1.50)               | 2.38<br>(1.41)                | <b>2.00</b><br><b>(1.37)</b> | <b>3.38*</b><br><b>(1.19)</b> | 2.56<br>(1.50)  | 2.22<br>(1.39) |
| 7. I think that other people like me can learn the use/operation of the technology quickly. | 4.40<br>(0.65)               | 4.20<br>(0.79)                                      | 4.50<br>(0.55)                                | 4.40<br>(0.55)                  | 4.75<br>(0.50)             | 4.41<br>(0.71)               | 4.38<br>(0.52)                | 4.35<br>(0.70)               | 4.50<br>(0.53)                | 4.31<br>(0.70)  | 4.56<br>(0.53) |
| 8. I think the technology is very inconvenient to use.                                      | 2.12<br>(1.54)               | 1.80<br>(1.48)                                      | 1.67<br>(1.21)                                | 2.80<br>(1.64)                  | 2.75<br>(2.06)             | 1.82<br>(1.29)               | 2.75<br>(1.91)                | 2.24<br>(1.52)               | 1.88<br>(1.64)                | 2.50<br>(1.44)  | 1.55<br>(1.33) |

|                                                                                         |                                      |                  |                 |                  |                  |                 |                  |                 |                  |                  |                 |
|-----------------------------------------------------------------------------------------|--------------------------------------|------------------|-----------------|------------------|------------------|-----------------|------------------|-----------------|------------------|------------------|-----------------|
| 9. I felt very confident using the technology.                                          | 4.48<br>(0.65)                       | 4.50<br>(0.71)   | 4.67<br>(0.52)  | 4.40<br>(0.55)   | 4.25<br>(0.96)   | 4.59<br>(0.62)  | 4.25<br>(0.71)   | 4.65<br>(0.49)  | 4.13<br>(0.83)   | 4.38<br>(0.72)   | 4.67<br>(0.50)  |
| 10. I might need to learn a lot of things before I could get going with the technology. | 4.52<br>(0.65)                       | 4.40<br>(0.70)   | 4.83<br>(0.41)  | 4.60<br>(0.55)   | 4.25<br>(0.96)   | 4.65<br>(0.70)  | 4.25<br>(0.46)   | 4.71<br>(0.47)  | 4.13<br>(0.83)   | 4.50<br>(0.63)   | 4.56<br>(0.73)  |
| <b>Total converted overall SUS score<sup>b</sup> (of 100)</b>                           | <b>68.40<sup>c</sup><br/>(10.35)</b> | 68.00<br>(11.83) | 70.83<br>(8.32) | 66.50<br>(11.40) | 68.12<br>(11.43) | 68.53<br>(8.06) | 68.12<br>(14.81) | 70.15<br>(9.90) | 64.69<br>(10.97) | 66.87<br>(11.20) | 71.11<br>(8.58) |

Abbreviation: SD=Standard deviation;

<sup>a</sup>1=strongly disagree; 2=somewhat disagree; 3=neutral or no opinion; 4=somewhat agree; 5=completely agree.

\*p-value <0.05 based on the one-way ANOVA for the 'Newborn resuscitation and/or NeoNatalie skill drill' variable and independent samples t-test for other variable.
